# Supplementary material for: Preferences for the provision of whole genome sequencing services among young adults
Source: PLOS journal article supplement (doi:10.1371/journal.pone.0174131), 2017-03-23
Supplement: S3 (10.1371/journal.pone.0174131.s003) [file journal.pone.0174131.s003]

**Supplementary Table 2: Sociodemographic Factors Correlated with Interest in Learning Specific Types of Genomic Information**

| Interest in learning:                                                                                                                                                                                                          | Hispanic or Latino,<br>$r(P)^{ab}$ | African American,<br>$r(P)^{ab}$ | Asian or Asian<br>American,<br>$r(P)^{ab}$ | Caucasian,<br>$r(P)^{ab}$ | Parents' Annual<br>Household<br>Income, $r(P)^{ab}$ |
|--------------------------------------------------------------------------------------------------------------------------------------------------------------------------------------------------------------------------------|------------------------------------|----------------------------------|--------------------------------------------|---------------------------|-----------------------------------------------------|
| Predictive information about preventable health conditions                                                                                                                                                                     | .09 (.30)                          | -.19 (.02)*                      | .01 (.96)                                  | .15 (.09)                 | .13 (.15)                                           |
| Predictive information about non-preventable health conditions                                                                                                                                                                 | .05 (.57)                          | .12 (.15)                        | .04 (.61)                                  | -.03 (.74)                | .09 (.35)                                           |
| Slight or moderate susceptibility to health conditions                                                                                                                                                                         | .11 (.19)                          | -.04 (.69)                       | .07 (.43)                                  | .05 (.56)                 | .183 (.05)*                                         |
| Pharmacogenomic information                                                                                                                                                                                                    | .12 (.14)                          | .06 (.46)                        | -.12 (.15)                                 | .14 (.11)                 | .24 (<.01)*                                         |
| Carrier status                                                                                                                                                                                                                 | -.035 (.68)                        | .05 (.59)                        | .07 (.41)                                  | .036 (.67)                | .151 (.11)                                          |
| Non-health related traits                                                                                                                                                                                                      | .11 (.17)                          | .13 (.14)                        | -.21 (.01)*                                | .20 (.02)*                | .06 (.52)                                           |
| Ancestry                                                                                                                                                                                                                       | .22 (<.01)*                        | -.03 (.76)                       | -.15 (.08)                                 | .134 (.11)                | .02 (.86)                                           |
| <sup>a</sup> Asterisk highlights correlations of $P \leq .05$ .<br><sup>b</sup> Inclusion in this table required that a sociodemographic factor have a significant relationship with at least one type of genomic information. |                                    |                                  |                                            |                           |                                                     |
